# Supplementary material for: Non-monotonic size change of monodisperse Fe3O4 nanoparticles in the scale-up synthesis
Source: Royal Society of Chemistry journal article supplement (doi:10.1039/c3nr33950e), 2013-01-01
Supplement: c3nr33950e.pdf [file c3nr33950e.pdf]

## Supporting Information

Table I. The influence of reaction precursor and surfactant/precursor ratio on particle size

| FeO•OH concentration (M) | OA/FeO•OH | Size (nm) | FeO•OH concentration (M) | OA/FeO•OH        | Size (nm) |
|--------------------------|-----------|-----------|--------------------------|------------------|-----------|
| Series 1<br>0.0125       | 1:1       | 20        | Series 3<br>0.1          | 1:1              | 18        |
|                          | 2:1       | 20        |                          | 2:1              | 12        |
|                          | 4:1       | 20        |                          | 4:1              | 2         |
|                          | 6:1       | 20        |                          | 6:1              | 3         |
|                          | 8:1       | 19        |                          | 8:1              | 10        |
|                          | 10:1      | 10        |                          | 10:1             | 22        |
|                          | 15:1      | 19        |                          | 12:1             | 0         |
|                          | 18:1      | 19        |                          | Series 4<br>0.15 | 1:1       |
|                          | 20:1      | 2         | 2:1                      |                  | 16        |
|                          | 24:1      | 0         | 4:1                      |                  | 3         |
|                          |           | 6:1       | 5                        |                  |           |
| Series 2<br>0.05         | 1:1       | 18        |                          | 8:1              | 6         |
|                          | 2:1       | 20        |                          | 9:1              | 1         |
|                          | 4:1       | 18        |                          | 10:1             | 0         |
|                          | 6:1       | 6         | Series 5<br>0.2          | 1:1              | 20        |
|                          | 8:1       | 11        |                          | 2:1              | 20        |
|                          | 10:1      | 18        |                          | 4:1              | 18        |
|                          | 11:1      | 19        |                          | 6:1              | 5         |
|                          | 12:1      | 16        |                          | 8:1              | 22        |
|                          | 12.5:1    | 11        |                          | 10:1             | 0         |
|                          | 12.25:1   | 1         |                          |                  |           |
|                          | 13:1      | 0         |                          | -----            | -----     |
